# Supplementary material
Source: Springer Nature journal article supplement (https://www.springermedizin.de/resource/supplementary/12936_2012_2233_MOESM6_ESM.pdf/9542614)

# STRATIFICATION CRITERIA

Any primary vector caught  
versus  
No primary vector caught

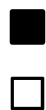

Highest 5% of mean primary vector catch  
versus  
Lowest 95% of mean primary vector catch

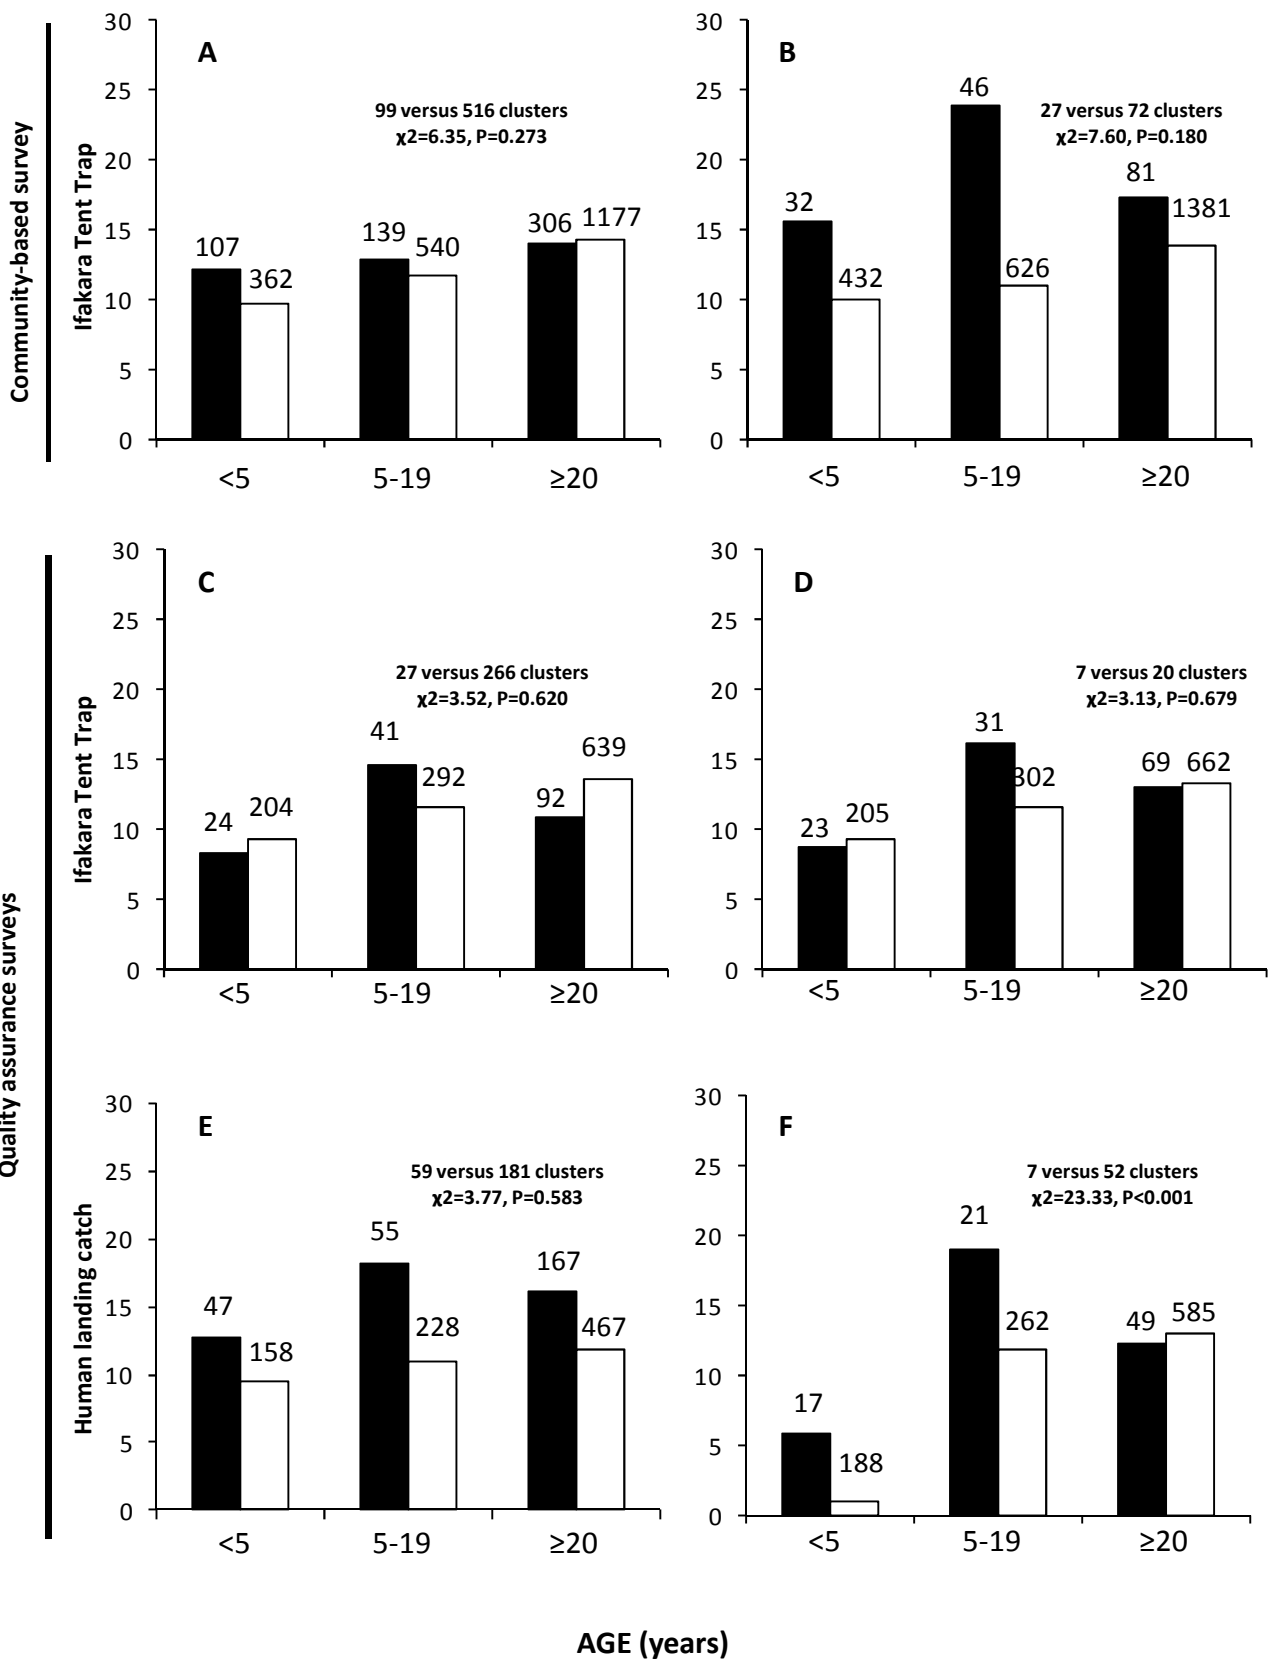

Supplement: MOESM6 [file 9542614]
